# Supplementary material
Source: HighWire-hosted journal article supplement (https://qualitysafety.bmj.com/content/32/1/34)

YouTube NL Zoeken



Leiden University  
Medical Center



# Maandelijke Feedback IQ Joint Project

*Interpretatie van de prestatie-uitkomsten*



Leiden University Medical Center

1. Orthopedisch chirurgie
2. Medische beslistkunde



0:11 / 12:50 • Introductie.) >



Supplement: inline-supplementary-material-2 [file inline-supplementary-material-2.pdf]
