# Supplementary material
Source: HighWire-hosted journal article supplement (https://qualitysafety.bmj.com/content/32/1/34)
Supplement: inline-supplementary-material-4 [file inline-supplementary-material-4.pdf]

# IQ Joint study

## Toolbox

## Content of Toolbox

In this toolbox we offer starting points for quality improvement initiatives based on the currently available literature. The chapters are ordered according to the performance outcomes as offered in the monthly feedback. It is noted that this is not an exhaustive list.

We advise to implement quality improvement initiatives according to the Plan-Do-Check-Act cycle.

### Plan-Do-Check-Act cycle

2

### Performance outcomes

- 1-year revision rate due to infection (THA & TKA) 3
- 1-year revision rate due to prosthesis loosening (THA & TKA) 5
- 1-year revision rate due to dislocation (THA) 7
- 1-year revision rate due to technical failure (TKA) 9
- Length-of-stay in hospital 11
- Readmissions 13
- Textbook Outcome & Ordinal Composite Outcome Measure 15

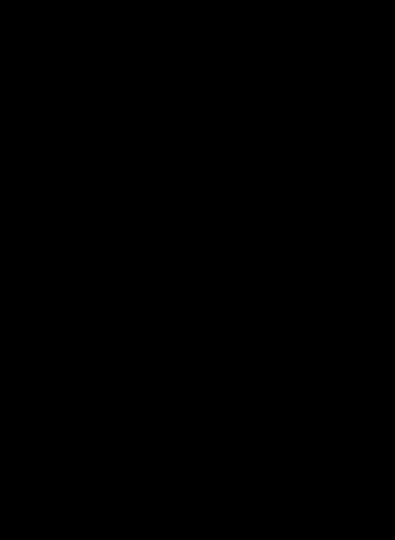

Check

1. What is the effect and is it as desired.
  - Example: Check the electronic patient files to see if the last 100 patients have all received antibiotic prophylaxis. No, 1 patient did not.

Act

1. Adopt the improvement/change or abandon it.
  - Example: Adopt the change because it has led to a substantial improvement.
2. Run through the cycle again.

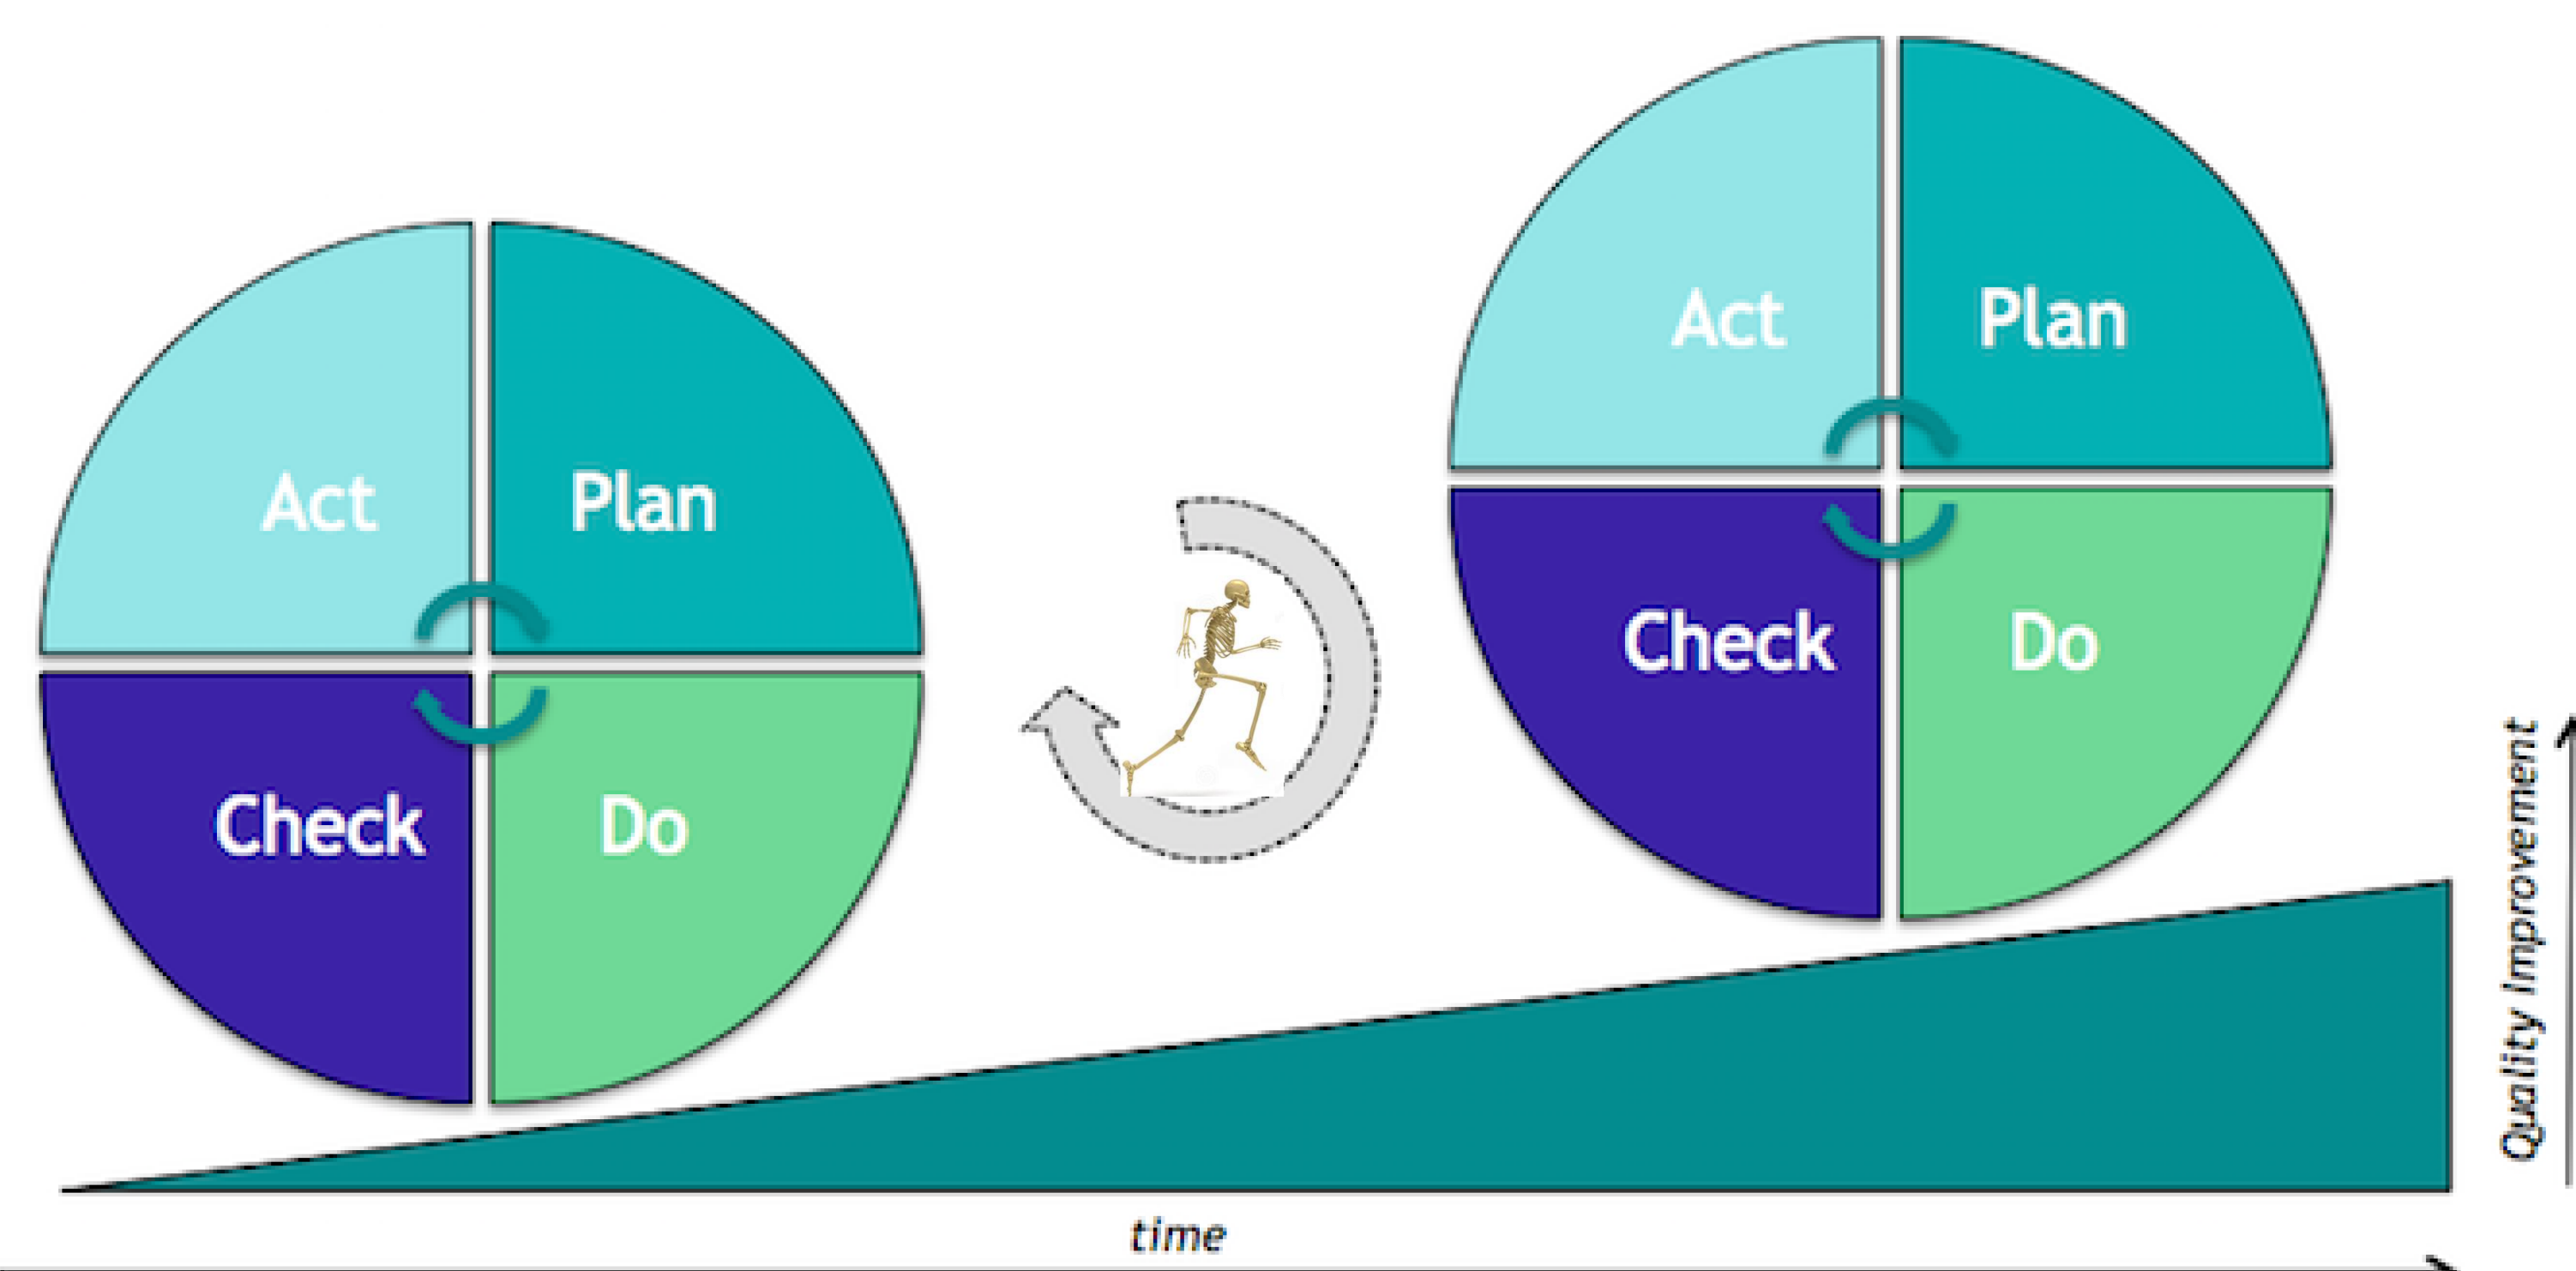

Plan-Do-Check-Act cycle - Tague, Nancy R 2005

***IQ Joint studiegroep:***

- P van Schie, coördinerend arts-onderzoeker
- Prof. dr. RGHH Nelissen, orthopedisch chirurg
- Dr. PJ Marang-van de Mheen, assistent professor medisch beslistkunde

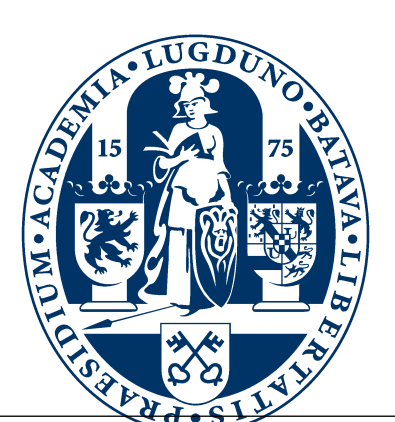



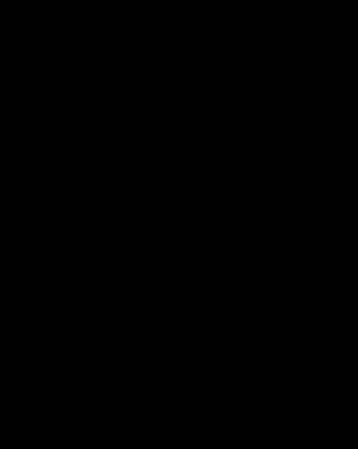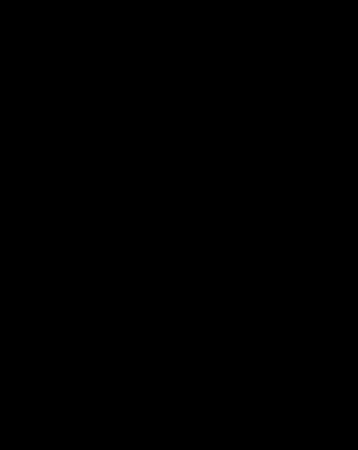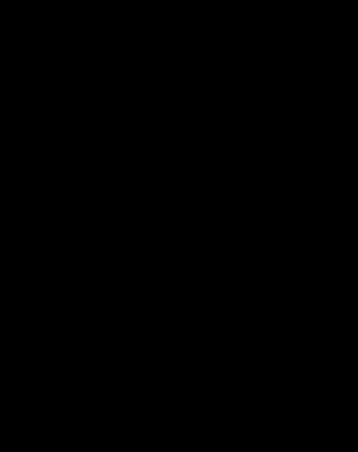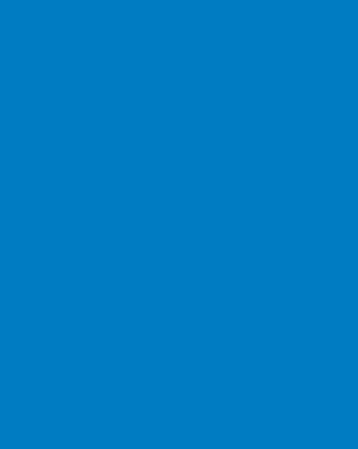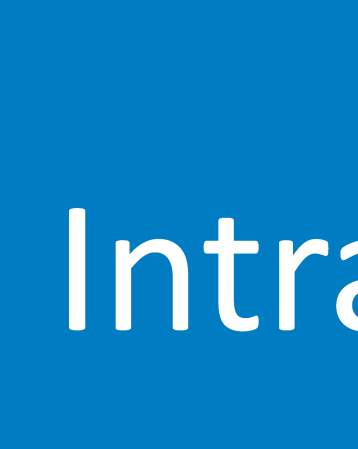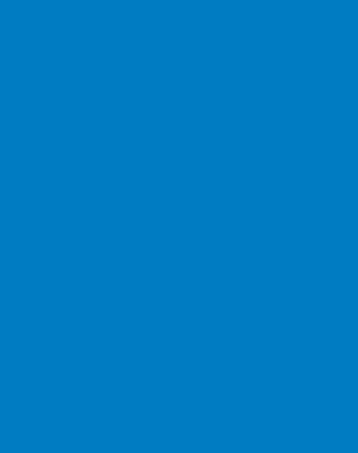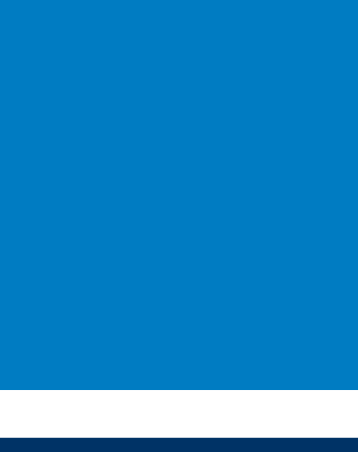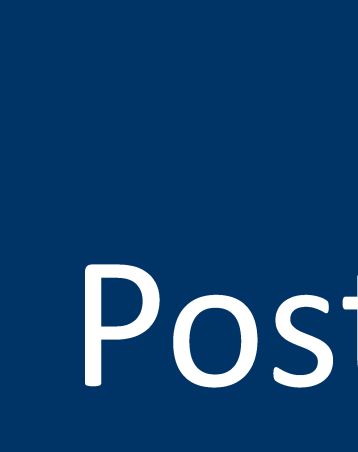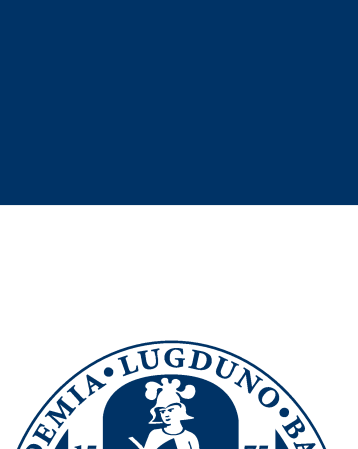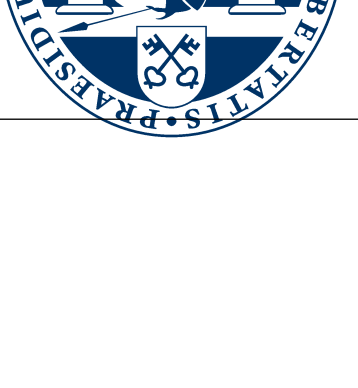

## Intra-operative

### Lavage

- Consider 3 minutes lavage with dilute antiseptic (betadine/chlorhexidine).<sup>19</sup> Avoid lavage with surfactants or antibiotics.<sup>23</sup> Use a low-pressure delivery system for a <2L volume of solution.<sup>23</sup>

### Prevent transfusions

- Check pre-operative hemoglobin level and correct if necessary preoperatively.
- Tranexamic acid might help minimize blood loss and wound infection.<sup>20,21</sup>

### Cement loaded with antibiotics

- As recommended in NOV-guidelines ([NOV guidelines - Antibiotica-laden cement](#)).

### Surgical approach

- Lateral surgical approach results in more infections compared to posterior approach.<sup>6</sup> However, each of the approaches has their own set of complications and benefits.

### Bearing surface

- Ceramic-on-ceramic and ceramic-on-polyethylene surfaces are associated with lower risk of revisions for infection after 12 and 24 months respectively compared to metal-on-polyethylene.<sup>6</sup>

## Post-operative

### Antibiotic prophylaxis

- As recommended in NOV-guidelines ([NOV guideline - systemic antibiotic prophylaxis](#)).

### Wound leakage

- Is a wound leakage protocol available and is it followed sufficient?

### Patient-specific factor optimization

- Blood glucose levels: Fasting blood glucose value <200mg/dl is suggested.<sup>22</sup>

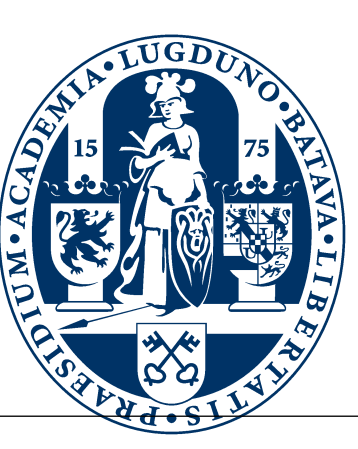

### ***IQ Joint studiegroep:***

• **P van Schie, coördinerend arts-onderzoeker**

• **Prof. dr. RGHH Nelissen, orthopedisch chirurg**

• **Dr. PJ Marang-van de Mheen, assistent professor medisch beslistkunde**



# IQ Joint study

## References

1. Mainous, M.R. and E.A. Deitch, Nutrition and infection. *Surg Clin North Am*, 1994. 74(3): p. 659-76.
2. Devoto, G., et al., Prealbumin serum concentrations as a useful tool in the assessment of malnutrition in hospitalized patients. *Clin Chem*, 2006. 52(12): p. 2281-5.
3. Dowsey, M.M. and P.F. Choong, Obese diabetic patients are at substantial risk for deep infection after primary TKA. *Clin Orthop Relat Res*, 2009. 467(6): p. 1577-81.
4. Dowsey, M.M. and P.F. Choong, Early outcomes and complications following joint arthroplasty in obese patients: a review of the published reports. *ANZ J Surg*, 2008. 78(6): p. 439-44.
5. D'Apuzzo, M.R., W.M. Novicoff, and J.A. Browne, The John Insall Award: Morbid obesity independently impacts complications, mortality, and resource use after TKA. *Clin Orthop Relat Res*, 2015. 473(1): p. 57-63.
6. Lenguerrand, E., et al., Risk factors associated with revision for prosthetic joint infection after hip replacement: a prospective observational cohort study. *Lancet Infect Dis*, 2018. 18(9): p. 1004-1014.
7. Kapadia, B.H., et al., Tobacco use may be associated with increased revision and complication rates following total hip arthroplasty. *J Arthroplasty*, 2014. 29(4): p. 777-80.
8. Kapadia, B.H., et al., Increased revision rates after total knee arthroplasty in patients who smoke. *J Arthroplasty*, 2012. 27(9): p. 1690-1695.e1.
9. Sorensen, L.T., Wound healing and infection in surgery. The clinical impact of smoking and smoking cessation: a systematic review and meta-analysis. *Arch Surg*, 2012. 147(4): p. 373-83.
10. Kapadia, B.H., et al., Pre-admission cutaneous chlorhexidine preparation reduces surgical site infections in total hip arthroplasty. *J Arthroplasty*, 2013. 28(3): p. 490-3.
11. Baratz, M.D., et al., Twenty Percent of Patients May Remain Colonized With Methicillin-resistant *Staphylococcus aureus* Despite a Decolonization Protocol in Patients Undergoing Elective Total Joint Arthroplasty. *Clin Orthop Relat Res*, 2015. 473(7): p. 2283-2290.
12. Rao, N., et al., Preoperative screening/decolonization for *Staphylococcus aureus* to prevent orthopedic surgical site infection: prospective cohort study with 2-year follow-up. *J Arthroplasty*, 2011. 26(8): p. 1501-7.
13. Sporer, S.M., T. Rogers, and L. Abella, Methicillin-Resistant and Methicillin-Sensitive *Staphylococcus aureus* Screening and Decolonization to Reduce Surgical Site Infection in Elective Total Joint Arthroplasty. *J Arthroplasty*, 2016. 31(9 Suppl): p. 144-7.
14. Schweizer, M.L., et al., Association of a bundled intervention with surgical site infections among patients undergoing cardiac, hip, or knee surgery. *Jama*, 2015. 313(21): p. 2162-71.
15. Stambough, J.B., et al., Corrigendum to "Decreased Hospital Costs and Surgical Site Infection Incidence With a Universal Decolonization Protocol in Primary Total Joint Arthroplasty" [*Journal of Arthroplasty* 32 (2017) 728-734]. *J Arthroplasty*, 2017. 32(8): p. 2625.
16. Kapadia, B.H., et al., Pre-admission cutaneous chlorhexidine preparation reduces surgical site infections in total hip arthroplasty. *J Arthroplasty*, 2013. 28(3): p. 490-3.
17. Johnson, A.J., et al., Chlorhexidine reduces infections in knee arthroplasty. *J Knee Surg*, 2013. 26(3): p. 213-8.
18. Bratzler, D.W., et al., Clinical practice guidelines for antimicrobial prophylaxis in surgery. *Surg Infect (Larchmt)*, 2013. 14(1): p. 73-156.
19. Brown, N.M., et al., Dilute betadine lavage before closure for the prevention of acute postoperative deep periprosthetic joint infection. *J Arthroplasty*, 2012. 27(1): p. 27-30.
20. Sukeik, M., et al., Systematic review and meta-analysis of the use of tranexamic acid in total hip replacement. *J Bone Joint Surg Br*, 2011. 93(1): p. 39-46.
21. Sukeik, M., et al., The effect of tranexamic acid on wound complications in primary total Hip Arthroplasty: A meta-analysis. *Surgeon*, 2019.
22. Mraovic, B., et al., Perioperative hyperglycemia and postoperative infection after lower limb arthroplasty. *J Diabetes Sci Technol*, 2011. 5(2): p. 412-8.
23. Kavolus, J., et al., Irrigation fluids used for the prevention and treatment of orthopaedic infections. *J Bone Joint Surg Am*, 2020;102:76-84.
24. Fields, A.C., J.C. Pradarelli, and K.M.F. Itani, Preventing Surgical Site Infections: Looking Beyond the Current Guidelines. *Jama*, 2020.
25. Gu A, et al., Preoperative malnutrition negatively correlates with postoperative wound complications and infection after total joint arthroplasty: a systematic review and meta-analysis. *J Arthroplasty*. 2019 May;34(5):1013-24.



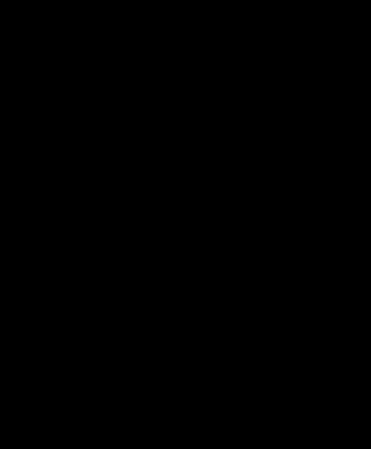

Ase

## Surgical factors

### THA &TKA

- Has a new prosthesis been implemented recently? Has sufficient training taken place? Schedule a meeting where experiences can be shared.

### Cementation techniques

- Distal and proximal prosthesis centralization
- Adequate canal preparation with pulsatile lavage to increase cement penetration and interdigitation.
- Is there profit to be gained within one of the phases: mixing, waiting, working or setting?
- Check the most recent manual for use of the cement.

Septic loosening

Take a look at the toolbox for infection

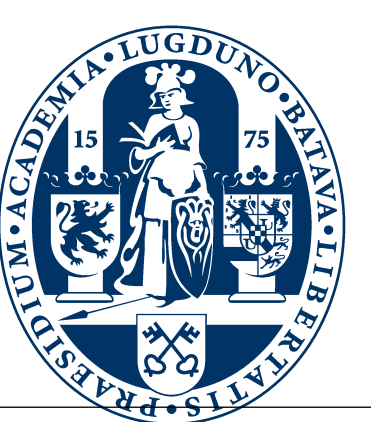

### ***IQ Joint studiegroep:***

•P van Schie, coördinerend arts-onderzoeker

•Prof. dr. RGHH Nelissen, orthopedisch chirurg

•Dr. PJ Marang-van de Mheen, assistent professor medisch besliskunde



# IQ Joint study

## References

1. Teng, S., et al., Smoking and risk of prosthesis-related complications after total hip arthroplasty: a meta-analysis of cohort studies. *PLoS One*, 2015. 10(4): p. e0125294.
2. Bordini, B., et al., Factors affecting aseptic loosening of 4750 total hip arthroplasties: multivariate survival analysis. *BMC Musculoskelet Disord*, 2007. 8: p. 69.
3. Flugsrud, G.B., et al., The effect of middle-age body weight and physical activity on the risk of early revision hip arthroplasty: a cohort study of 1,535 individuals. *Acta Orthop*, 2007. 78(1): p. 99-107.
4. Lubbeke, A., et al., Influence of patient activity on femoral osteolysis at five and ten years following hybrid total hip replacement. *J Bone Joint Surg Br*, 2011. 93(4): p. 456-63.
5. Schmalzried, T.P., et al., The John Charnley Award. Wear is a function of use, not time. *Clin Orthop Relat Res*, 2000(381): p. 36-46.
6. Emms, N.W., et al., Long-term outcome of a cementless, hemispherical, press-fit acetabular component: survivorship analysis and dose-response relationship to linear polyethylene wear. *J Bone Joint Surg Br*, 2010. 92(6): p. 856-61.
7. Australian Orthopaedic Association National Joint Registry, Annual report. 2017
8. Paxton, E.W., et al., Metal-on-conventional polyethylene total hip arthroplasty bearing surfaces have a higher risk of revision than metal-on-highly crosslinked polyethylene: results from a US registry. *Clin Orthop Relat Res*, 2015. 473(3): p. 1011-21.
9. Hanna, S.A., et al., Highly cross-linked polyethylene decreases the rate of revision of total hip arthroplasty compared with conventional polyethylene at 13 years' follow-up. *Bone Joint J*, 2016. 98-b(1): p. 28-32.
10. Nakama, G.Y., et al., Cemented, cementless or hybrid fixation options in total knee arthroplasty for osteoarthritis and other non-traumatic diseases. *Cochrane Database Syst Rev*, 2012. 10: p. CD006193.



## Intra-operative

- Some registries report increased dislocation rates for posterior approach when compared to anterior and direct lateral at 6-year follow-up.<sup>10,11</sup> However, the revision rate for all other revisions was higher with anterior approach and lowest with posterior approach.<sup>10</sup>
- If the posterior approach is chosen, surgeons should reconstruct the posterior capsule and the external rotators to prevent dislocations ([NOV guideline - surgical approach](#)).

### Dual mobility cup

- Dual mobility articulations are a viable alternative in cases with increased risk of instability or dislocation, however, evidence is limited ([NOV guideline - dual mobility cup](#)). Following patient groups have an increased risk of dislocations and may benefit from a dual mobility cup: spinal injury, poliomyelitis, cerebral palsy, femoral neck fracture, acetabular dysplasia, muscular dystrophy and intellectual impairment.<sup>12-16</sup>
- The 5-year cup revision rates are comparable to that of traditional unipolar cups.<sup>17</sup>

### Stability Assessment

- Minimize impingement by removing osteophytes, thickened capsule or increase offset.
- A lipped liner can offer stability in extremes of movement.<sup>18</sup>

### New prosthesis

- Has sufficient training taken place?
- Schedule a meeting where experiences can be shared.

## Post-operative

### Hip dislocation precaution

- Early dislocation rates do not decrease with hip dislocation precaution.<sup>16,19</sup> Evidence is limited and included only studies with anterolateral and posterolateral approaches. Further, abandoning mobilization restrictions increases patient satisfaction through earlier return of daily activities to preoperative levels.<sup>20,21</sup>

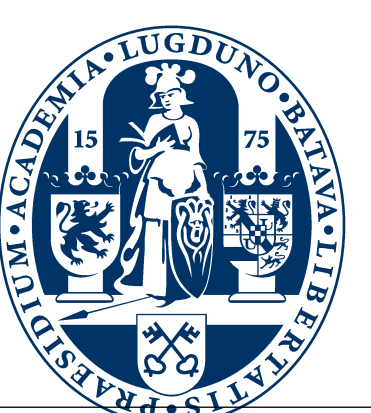

### ***IQ Joint studiegroep:***

• **P van Schie, coördinerend arts-onderzoeker**

• **Prof. dr. RGHH Nelissen, orthopedisch chirurg**

• **Dr. PJ Marang-van de Mheen, assistent professor medisch beslistkunde**



# IQ Joint study

## References

1. Howie, D.W., O.T. Holubowycz, and R. Middleton, Large femoral heads decrease the incidence of dislocation after total hip arthroplasty: a randomized controlled trial. *J Bone Joint Surg Am*, 2012. 94(12): p. 1095-102.
2. Haverkamp, D., et al., Obesity in total hip arthroplasty--does it really matter? A meta-analysis. *Acta Orthop*, 2011. 82(4): p. 417-22.
3. Wagner, E.R., et al., Effect of Body Mass Index on Complications and Reoperations After Total Hip Arthroplasty. *J Bone Joint Surg Am*, 2016. 98(3): p. 169-79.
4. Li, W., et al., Functional Gain and Pain Relief After Total Joint Replacement According to Obesity Status. *J Bone Joint Surg Am*, 2017. 99(14): p. 1183-1189.
5. Stroh, D.A., et al., Reduced dislocation rates and excellent functional outcomes with large-diameter femoral heads. *J Arthroplasty*, 2013. 28(8): p. 1415-20.
6. Sariali, E., et al., Mathematical evaluation of jumping distance in total hip arthroplasty: influence of abduction angle, femoral head offset, and head diameter. *Acta Orthop*, 2009. 80(3): p. 277-82.
7. Kostensalo, I., et al., Effect of femoral head size on risk of revision for dislocation after total hip arthroplasty: a population-based analysis of 42,379 primary procedures from the Finnish Arthroplasty Register. *Acta Orthop*, 2013. 84(4): p. 342-7.
8. Tsikandylakis, G., et al., Head size in primary total hip arthroplasty. *EFORT Open Rev*, 2018. 3(5): p. 225-231.
9. Charnley, J., A. Kamangar, and M.D. Longfield, The optimum size of prosthetic heads in relation to the wear of plastic sockets in total replacement of the hip. *Med Biol Eng*, 1969. 7(1): p. 31-9.
10. Zijlstra, W.P., et al., Effect of femoral head size and surgical approach on risk of revision for dislocation after total hip arthroplasty. *Acta Orthop*, 2017. 88(4): p. 395-401.
11. Sheth, D., et al., Anterior and Anterolateral Approaches for THA Are Associated With Lower Dislocation Risk Without Higher Revision Risk. *Clin Orthop Relat Res*, 2015. 473(11): p. 3401-3408.
12. Hernigou, P., et al., Dual-mobility or Constrained Liners Are More Effective Than Preoperative Bariatric Surgery in Prevention of THA Dislocation. *Clin Orthop Relat Res*, 2016. 474(10): p. 2202-10.
13. Queally, J.M., A. Abdulkarim, and K.J. Mulhall, Total hip replacement in patients with neurological conditions. *J Bone Joint Surg Br*, 2009. 91(10): p. 1267-73.
14. Houdek, M.T., et al., Total Hip Arthroplasty in Patients with Cerebral Palsy: A Cohort Study Matched to Patients with Osteoarthritis. *J Bone Joint Surg Am*, 2017. 99(6): p. 488-493.
15. Sanders, R.J., B.A. Swierstra, and J.H. Goosen, The use of a dual-mobility concept in total hip arthroplasty patients with spastic disorders: no dislocations in a series of ten cases at midterm follow-up. *Arch Orthop Trauma Surg*, 2013. 133(7): p. 1011-6.
16. Barnsley, L., L. Barnsley, and R. Page, Are Hip Precautions Necessary Post Total Hip Arthroplasty? A Systematic Review. *Geriatr Orthop Surg Rehabil*, 2015. 6(3): p. 230-5.
17. Bloemheugel, E.M., L.N. van Steenberghe, and B.A. Swierstra, Dual mobility cups in primary total hip arthroplasties: trend over time in use, patient characteristics, and mid-term revision in 3,038 cases in the Dutch Arthroplasty Register (2007-2016). *Acta Orthop*, 2019. 90(1): p. 11-14.
18. Sculco, P.K., et al., Avoiding Hip Instability and Limb Length Discrepancy After Total Hip Arthroplasty. *Orthop Clin North Am*, 2016. 47(2): p. 327-34.
19. Gromov, K., et al., Removal of restrictions following primary THA with posterolateral approach does not increase the risk of early dislocation. *Acta Orthop*, 2015. 86(4): p. 463-8.
20. Ververeli, P.A., et al., Evaluation of reducing postoperative hip precautions in total hip replacement: a randomized prospective study. *Orthopedics*, 2009. 32(12): p. 889.
21. Peak, E.L., et al., The role of patient restrictions in reducing the prevalence of early dislocation following total hip arthroplasty. A randomized, prospective study. *J Bone Joint Surg Am*, 2005. 87(2): p. 247-53.



## Instability

rupture or laxity of the posterior cruciate ligament or medial collateral ligament and patellar tendon rupture or patella fracture.<sup>11-16</sup>

- Some patient are prone to instability. Those who have rheumatoid arthritis, connective tissue disease, severe osteoporosis, neuromuscular pathology, gross deformities who need severe correction with ligament release, foot deformities and quadriceps/medial thrust hip abductor weakness.<sup>15,17</sup>

### Patient-specific factor optimization

- Overweight: Aim for a BMI < 30 kg/m<sup>2</sup>. Obesity is a risk factor because it complicates surgical exposure, jeopardizes the collateral ligament.<sup>15</sup>

### Pre-operative / intra-operative

- Evaluation the state of the lateral and medial collateral ligament and posterior cruciate ligament (PCL) with physical examination in order to select the right implant for each patient.<sup>16</sup> Instability can be prevented in most cases with appropriate prosthesis selection and good surgical technique (e.g. prevent soft tissue damage, correct implantation of components in every plane).<sup>12,14</sup> Posterior stabilized implants should be utilized in those patients with PCL insufficiency and in those with increase risk of posterior instability (e.g. rheumatoid arthritis, need to resect the PCL, flexion contracture or previous tibial osteotomy). If the choice is made to preserve the PCL, it is important to take special care in maintaining its integrity when the tibial cut is made. In case of doubt, it is preferable to convert the arthroplasty to a posterior stabilized design. In some patients with marked instability (medial or lateral collateral loss, massive bone loss including the femoral condyles, complete or insufficiency of the PCL, poliomyelitis, or Charcot arthropathy), a primary constrained or linked hinge implant may be indicated.<sup>16</sup>

## Patellar dislocation

### Intra-operative

- Patella maltracking or dislocation is closely related to malalignment. In most patients, functional patellar tracking is achieved by a good prosthesis positioning by checking the femoral implant rotation, femoral implant flexion, femoral implants varus/valgus positioning, femoral implant mediolateral or medialization, tibial implant rotation. Excessive internal rotation of the tibial component or femur component promotes external rotation during walking, thereby increasing the risk of patellar dislocation. The more externally rotated the implant, the less risk there is for lateral patellar maltracking. However, this must not be at the expense of tibiofemoral alignment and stability.<sup>11</sup> Postoperative patella alta and non-medialized implantation of a patellar prosthesis are also risk factor.<sup>18</sup>



# IQ Joint study

## References

1. Jeffery, R.S., R.W. Morris, and R.A. Denham, Coronal alignment after total knee replacement. *J Bone Joint Surg Br*, 1991. 73(5): p. 709-14.
2. Kim, Y.H., et al., Computer-assisted surgical navigation does not improve the alignment and orientation of the components in total knee arthroplasty. *J Bone Joint Surg Am*, 2009. 91(1): p. 14-9.
3. Hadi, M., et al., Does malalignment affect revision rate in total knee replacements: a systematic review of the literature. Springerplus, 2015. 4: p. 835.
4. Parratte, S., et al., Effect of postoperative mechanical axis alignment on the fifteen-year survival of modern, cemented total knee replacements. *J Bone Joint Surg Am*, 2010. 92(12): p. 2143-9.
5. Bonner, T.J., et al., The effect of post-operative mechanical axis alignment on the survival of primary total knee replacements after a follow-up of 15 years. *J Bone Joint Surg Br*, 2011. 93(9): p. 1217-22.
6. Magnussen, R.A., et al., Residual varus alignment does not compromise results of TKAs in patients with preoperative varus. *Clin Orthop Relat Res*, 2011. 469(12): p. 3443-50.
7. Matziolis, G., J. Adam, and C. Perka, Varus malalignment has no influence on clinical outcome in midterm follow-up after total knee replacement. *Arch Orthop Trauma Surg*, 2010. 130(12): p. 1487-91.
8. Ritter, M.A., et al., The effect of alignment and BMI on failure of total knee replacement. *J Bone Joint Surg Am*, 2011. 93(17): p. 1588-96.
9. Kim, Y.H., et al., The relationship between the survival of total knee arthroplasty and postoperative coronal, sagittal and rotational alignment of knee prosthesis. *Int Orthop*, 2014. 38(2): p. 379-85.
10. Fang, D.M., M.A. Ritter, and K.E. Davis, Coronal alignment in total knee arthroplasty: just how important is it? *J Arthroplasty*, 2009. 24(6 Suppl): p. 39-43.
11. Bozic, K.J., et al., The epidemiology of revision total knee arthroplasty in the United States. *Clin Orthop Relat Res*, 2010. 468(1): p. 45-51.
12. Sharkey, P.F., et al., Insall Award paper. Why are total knee arthroplasties failing today? *Clin Orthop Relat Res*, 2002(404): p. 7-13.
13. Goe, T.J., et al., Why are total knee replacements revised?: analysis of early revision in a community knee implant registry. *Clin Orthop Relat Res*, 2004(428): p. 100-6.
14. Chang, M.J., et al., Diagnosis, causes and treatments of instability following total knee arthroplasty. *Knee Surg Relat Res*, 2014. 26(2): p. 61-7.
15. Vince, K.G., A. Abdeen, and T. Sugimori, The unstable total knee arthroplasty: causes and cures. *J Arthroplasty*, 2006. 21(4 Suppl 1): p. 44-9.
16. Rodriguez-Merchan, E.C., Instability following total knee arthroplasty. *Hss j*, 2011. 7(3): p. 273-8.
17. Meding, J.B., et al., Genu recurvatum in total knee replacement. *Clin Orthop Relat Res*, 2003(416): p. 64-7.
18. Berger, Crossett, Jacobs, Rubash. 1998.
19. Valkering K.P., et al. Effect of rotational alignment on outcome of total knee arthroplasty; A systematic review of the literature and correlation analysis. *Acta Orthopaedica*, 86:4, 432-439.



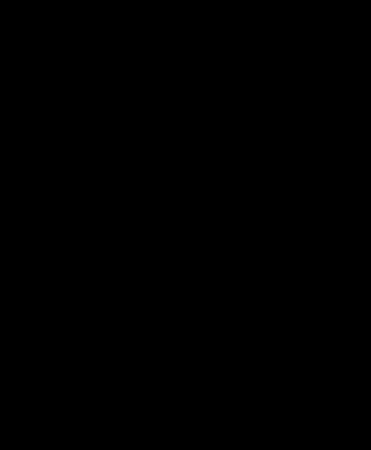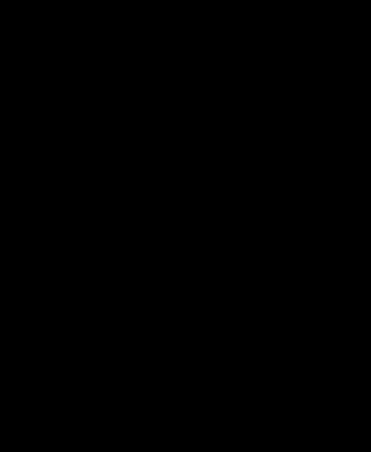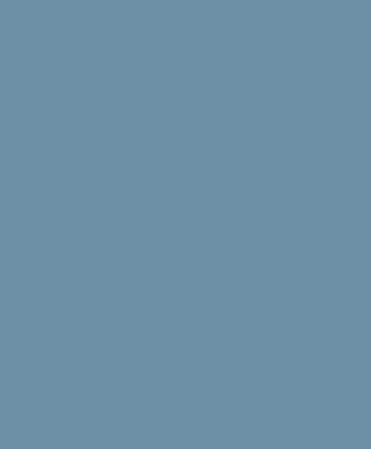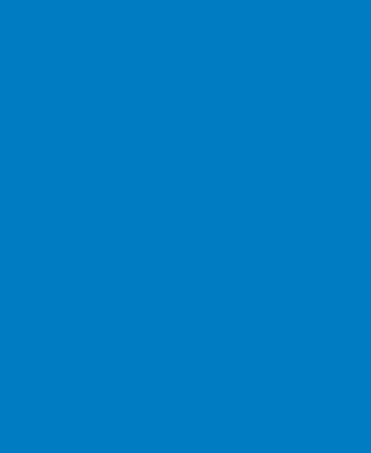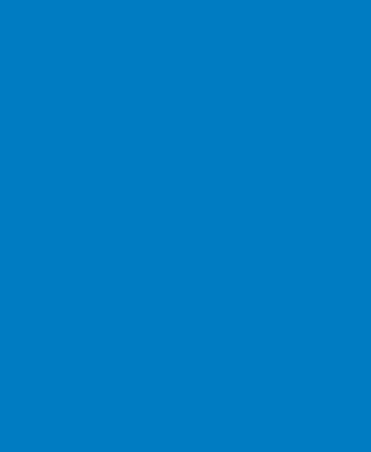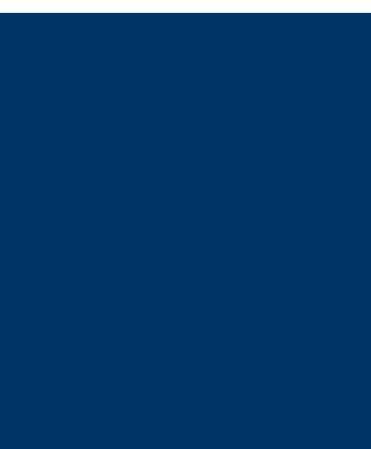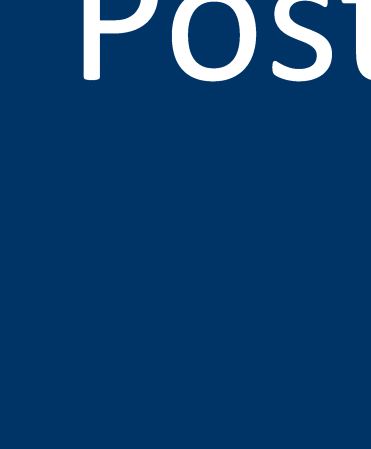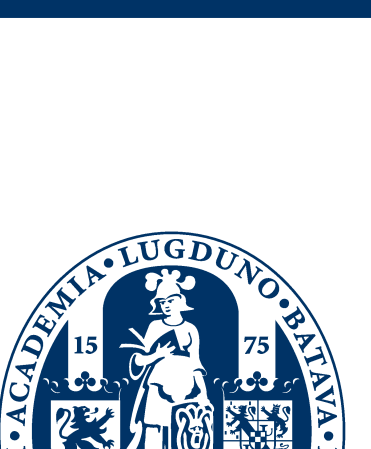

among TKA patients and leads to increased opioid consumption post-operative. It should be detected in pre-operative evaluation and the patient need to be persuaded to keep opioid use to a minimum.<sup>6,7</sup>

- Social support; inadequate social support e.g. living alone, is associated with a longer LOS. Optimizing the organizational part of patient pathway and optimizing social support before admission for surgery avoids delayed discharge.<sup>8,9</sup>

#### Medication

- A protocol of scheduled oral narcotics, cyclooxygenase-2 inhibitors, a local anesthetic for wound infiltration and no intrathecal narcotics (TKA: add femoral nerve catheter) shows significant improvements regarding LOS and post-operative pain-scores.<sup>10</sup> However, another study showed only a significant improvement in pain-scores and opioid requirements, but showed an effect on LOS although not significant.<sup>11</sup>
- A single dose of 125 mg methylprednisolone given pre-operatively, reduces pain in THA patient in the first post-operative 24 hours, thus enlarging the chance of satisfactory day-of-surgery mobilization and early discharge.<sup>12,13</sup>

#### Surgical technique

- Direct anterior approach (DAA) shows an advantage regarding mean hospital stay compared with posterolateral (PL) approach in THA surgery.<sup>14</sup>

#### Delay of discharge

- Medical interventions; delay of discharge due to e.g. waiting for blood transfusion, start of physiotherapy or post-operative radiographic examination, should be avoided through multidisciplinary organization and planning.<sup>15</sup>
- Repeating / mentioning of the expected date and time of delay when there are no complications.

#### Oral pain treatment

- Oral treatment should be a combination of a NSAID, paracetamol and short acting-opioid.

#### Mobilization on day of surgery

- Mobilization on the day of surgery significantly increases the probability of early discharge.<sup>16</sup>

## Intra-operative

## Post-operative

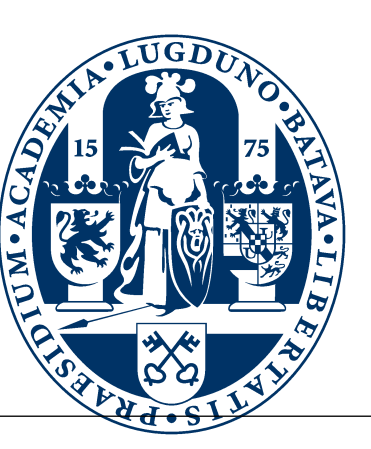

#### ***IQ Joint studiegroep:***

• **P van Schie, coördinerend arts-onderzoeker**

• **Prof. dr. RGHH Nelissen, orthopedisch chirurg**

• **Dr. PJ Marang-van de Mheen, assistent professor medisch beslistkunde**



# IQ Joint studie

## Referenties

1. Ansari, D., et al. (2013). "Fast-track surgery: procedure-specific aspects and future direction." *Langenbecks Arch Surg* 398(1): 29-37.
2. Hansen, TB. Fast track in hip arthroplasty. 2017
3. Viens, N. A., et al. (2012). "Role of diabetes type in perioperative outcomes after hip and knee arthroplasty in the United States." *J Surg Orthop Adv* 21(4): 253-260.
4. Jans, O., et al. (2014). "Role of preoperative anemia for risk of transfusion and postoperative morbidity in fast-track hip and knee arthroplasty." *Transfusion* 54(3): 717-726.
5. Nicholson, J. A., et al. (2012). "Nutritional status and short-term outcome of hip arthroplasty." *J Orthop Surg (Hong Kong)* 20(3): 331-335.
6. Aasvang, E. K., et al. (2016). "Chronic pre-operative opioid use and acute pain after fast-track total knee arthroplasty." *Acta Anaesthesiol Scand* 60(4): 529-536.
7. Goesling, J., et al. (2016). "Trends and predictors of opioid use after total knee and total hip arthroplasty." *Pain* 157(6): 1259-1265.
8. Napier, R. J., et al. (2013). "Modifiable factors delaying early discharge following primary joint arthroplasty." *Eur J Orthop Surg Traumatol* 23(6): 665-669.
9. den Hartog, Y. M., et al. (2015). "Which patient characteristics influence length of hospital stay after primary total hip arthroplasty in a 'fast-track' setting?" *Bone Joint J* 97-B(1): 19-23.
10. Peters, C. L., et al. (2006). "The effect of a new multimodal perioperative anesthetic regimen on postoperative pain, side effects, rehabilitation, and length of hospital stay after total joint arthroplasty." *J Arthroplasty* 21(6 Suppl 2): 132-138.
11. Andersen, L. O. and H. Kehlet (2014). "Analgesic efficacy of local infiltration analgesia in hip and knee arthroplasty: a systematic review." *Br J Anaesth* 113(3): 360-374.
12. Husted, H., et al. (2010). "Care principles at four fast-track arthroplasty departments in Denmark." *Dan Med Bull* 57(7): A4166.
13. Lunn, T. H., et al. (2013). "Effect of high-dose preoperative methylprednisolone on recovery after total hip arthroplasty: a randomized, double-blind, placebo-controlled trial." *Br J Anaesth* 110(1): 66-73.
14. Godoy-Monzon, D., et al. (2019). "Comparative study of radiological and functional outcomes following a direct anterior approach versus to a posterolateral approach to the hip." *Rev Esp Cir Ortop Traumatol* 63(5): 370-375.
15. Husted, H., et al. (2011). "Why still in hospital after fast-track hip and knee arthroplasty?" *Acta Orthop* 82(6): 679-684.
16. Okamoto, T., et al. (2016). "Day-of-Surgery Mobilization Reduces the Length of Stay After Elective Hip Arthroplasty." *J Arthroplasty* 31(10): 2227-2230.



## What kind of readmissions are involved

- Smoking: Convince patients to participate in smoking cessation programs. Smoking increases the risk of 90-days readmission.<sup>8,10</sup>

An example of a plan of approach for file investigation:

1. Take a closer look at 50 file. Exclude patients with relatively high mortality risk. These are the patients with probably a high disease burden and therefore relatively little chance of finding points for improvement.
2. How soon after discharge did the readmission take place (within a week or later)? Selection for early readmissions gives maximum chance to find improvement regarding potential too early discharge or incorrect information transfer. Selection for late readmissions often indicates complications after discharge.
3. Make a distinction between re-admissions in the same diagnosis group as the index admission versus in another diagnosis group. If the re-admission diagnosis group is the same as the index admission, this may be an indication that the patient was discharged too soon. If the re-admission concerns a different diagnosis group than the index admission, then there may be a re-admission with a complication. Of course it is possible that there is no relationship with the surgical procedure earlier.



***IQ Joint studiegroep:***

•P van Schie, coördinerend arts-onderzoeker

•Prof. dr. RGHH Nelissen, orthopedisch chirurg

•Dr. PJ Marang-van de Mheen, assistent professor medisch beslistkunde



# IQ Joint study

## Referenties

1. Braud, J., Ramanathan, D., Klika, A., Navale, S., Higuera, C., Molloy, R. Temporal Relations of Unplanned Readmissions Following Total Knee Arthroplasty: A Study of Large State Inpatient Databases. *J Arthroplasty*. 2017; 32(9S): p. S119-S123.
2. WHO Regional Office for Europe. Do current discharge arrangements from inpatient hospital care for the elderly reduce readmission rates, the length of inpatient stay or mortality, or improve health status?. Copenhagen, Denmark: WHO Regional Office for Europe; 2005.
3. Mesko, N.W., Bachmann, K.R., Kovacevic, D., LoGrasso, M.E., O'Rourke, C., Froimson, M.I. Thirty-day readmission following total hip and knee arthroplasty - a preliminary single institution predictive model. *J Arthroplasty*. 2014; 29(8): p. 1532-8.
4. Sutton, J.C., 3rd, Antoniou, J., Epure, L.M., Huk, O.L., Zukor, D.J., Bergeron, S.G. Hospital Discharge within 2 Days Following Total Hip or Knee Arthroplasty Does Not Increase Major-Complication and Readmission Rates. *J Bone Joint Surg Am*. 2016; 98(17): p. 1419-28.
5. Bini, S.A., Inacio, M.C., Cafri, G. Two-Day Length of Stay is Not Inferior to 3 Days in Total Knee Arthroplasty with Regards to 30-Day Readmissions. *J Arthroplasty*. 2015; 30(5): p. 733-8.
6. Berg, U., BuLow, E., Sundberg, M., Rolfson, O. No increase in readmissions or adverse events after implementation of fast-track program in total hip and knee replacement at 8 Swedish hospitals: An observational before-and-after study of 14,148 total joint replacements 2011-2015. *Acta Orthopaedica*. 2018; 89(5): p. 522-527.
7. Zhu, S., Qian, W., Jiang, C., Ye, C., Chen, X. Enhanced recovery after surgery for hip and knee arthroplasty: a systematic review and meta-analysis. *Postgrad Med J*. 2017; 93(1106): p. 736-742.
8. Charpentier, P.M., Srivastava, A.K., Zheng, H., Ostrander, J.D., Hughes, R.E. Readmission Rates for One Versus Two-Midnight Length of Stay for Primary Total Knee Arthroplasty: Analysis of the Michigan Arthroplasty Registry Collaborative Quality Initiative (MARCQI) Database. *J Bone Joint Surg Am*. 2018; 100(20): p. 1757-1764.
9. Sibia, U.S., Waite, K.A., Callanan, M.A., Park, A.E., King, P.J., MacDonald, J.H. Do shorter lengths of stay increase readmissions after total joint replacements? *Arthroplast Today*. 2017; 3(1): p. 51-55.
10. Sahota, S., Lovecchio, F., Harold, R.E., Beal, M.D., Manning, D.W. The Effect of Smoking on Thirty-Day Postoperative Complications After Total Joint Arthroplasty: A Propensity Score-Matched Analysis. *J Arthroplasty*. 2018; 33(1): p. 30-35.



# IQ Joint study

## Toolbox

## Outcome: Textbook Outcome & Ordinal Composite Outcome Measure

Topics are described where quality improvement initiatives could be considered.

Separately looking at the 3 indicators revision within 1 year, readmission within 30 days and prolonged length-of-stay (a length of stay in the upper tertile) have disadvantages. When conducting file investigations, there is a chance that the same file will be requested 3 times and that many must be investigated to find opportunities for quality improvement. Furthermore, single outcomes do not provide insight for professionals and patients into which part of the patients everything went well. For the above 3 indicators, a TO would mean that a patient did not undergo a revision within 1 year, had no readmission within 30 days and had a normal length-of-stay.

However, hospitals with a TO that differs significantly from the average gives little information about which outcome was specifically worse/good. Therefore the Ordinal Composite Outcome measure (Textbook Outcome Plus; TOP) has been developed. This is an extension of the TO with the additional element that the different combinations of the results are arranged (instead of all in 1 non-TO group), so that it could be seen in which group the hospital deviates from the average. The order is from the best to the worst outcome as follows:

- No revision within one year, no readmission within 30 days, no prolonged length-of-stay (**Textbook Outcome**)
- No revision within one year, no readmission within 30 days, prolonged length-of-stay
- No revision within one year, readmission within 30 days, no prolonged length-of-stay
- No revision within one year, readmission within 30 days, prolonged length-of-stay
- Revision within one year, no readmission within 30 days, no prolonged length-of-stay
- Revision within one year, no readmission within 30 days, prolonged length-of-stay
- Revision within one year, readmission within 30 days, no prolonged length-of-stay
- Revision within one year, readmission within 30 days, prolonged length-of-stay

This ordered outcome measure can also be corrected for patient-mix by using different funnel-plots where group 1 is compared with the rest, group 2 versus the rest, etc.. With this method, it can be indicated in which group your hospital differs significantly. These funnel-plots can be supplied on request.

If a hospital deviates from one of these groups, specific file investigation on these patients could be performed. For possible quality improvement initiatives, I refer to the Toolboxes for revision, readmission and prolonged length of hospital stay.
