# Supplementary material
Source: HighWire-hosted journal article supplement (https://qualitysafety.bmj.com/content/32/1/34)
Supplement: inline-supplementary-material-5 [file inline-supplementary-material-5.pdf]

## Surveys

The survey was emailed every two months together with the feedback to evaluate adherence to the intervention, encourage reviewing the feedback, introduce QII if necessary, and stimulate trial engagement. Participants could report best practices and experiences to be added to the toolbox and shared with others, also to stimulate trial engagement. The questionnaire has been translated from Dutch.

1. Have you read and interpreted the monthly feedback containing the performance outcomes of primary total hip and/or knee arthroplasties (THP/TKP)?
  - a. Yes, the feedback was clear
  - b. Yes, but the feedback was not clear because .....
  - c. No, I did not get around to this
  
2. Has the feedback been discussed within your department?
  - a. Yes, we saw potential to improve at least one of the performance outcomes
  - b. Yes, but we did not see any potential to improve one of the performance outcomes
  - c. No, we did not get around to this
  
3. Are there any performance outcomes for which, according to the feedback, your center underperforms or has performed worse than the average for the IQ Joint study group? You may select multiple outcomes.
  - a. Revision within one year
  - b. Readmission within 30 days
  - c. Complications within 30 days
  - d. Long length of stay
  - e. None
  
4. For which performance outcome(s) have improvement initiatives been undertaken since the start of the study (October 2019)? Enter what you/your healthcare institution have done in the free text field below the relevant performance outcome. You may select multiple outcomes.
  - a. Revision within one year
    - i. ....
  - b. Readmission within 30 days
    - i. ....
  - c. Complications within 30 days
    - i. ....
  - d. Long length of stay
    - i. ....
  - e. None
  
5. If applicable, indicate for each improvement initiative undertaken to improve a performance outcome, how your center chose this improvement initiative.

|  | Toolbox | Literature | Expert advice | Other (free text field) | No improvement |
|--|---------|------------|---------------|-------------------------|----------------|
|  |         |            |               |                         |                |

|                     |        |        |        |       |                                        |
|---------------------|--------|--------|--------|-------|----------------------------------------|
|                     |        |        |        |       | initiative undertaken for this outcome |
| Revision            | Yes/No | Yes/No | Yes/No | ..... | Yes/No                                 |
| Readmission         | Yes/No | Yes/No | Yes/No | ..... | Yes/No                                 |
| Complications       | Yes/No | Yes/No | Yes/No | ..... | Yes/No                                 |
| Long length of stay | Yes/No | Yes/No | Yes/No | ..... | Yes/No                                 |

6. What would you or your center need to improve further? You may select multiple answers.
- Further explanation of the interpretation of performance outcomes in the feedback
  - Link to another center that scores better for an outcome for which we score worse
  - More items in the toolbox, namely .....
7. This is the last question. You can still click back to make adjustments. After this question, the questionnaire is sent immediately. There is still room for questions and/or suggestions in the free text field.

.....

Thank you for participating in this survey. In order to be able to learn from each other and to give each other new ideas, the improvement initiatives of all participating centers will be included in the Toolbox.
